# Supplementary material
Source: ML conference proceedings conference paper supplement (https://openaccess.thecvf.com/content/ACCV2020/html/Zhang_MLIFeat_Multi-level_information_ACCV_2020_paper.html)
Supplement: Supplementary file 1 [file Zhang_MLIFeat_Multi-level_information_ACCV_2020_supplemental.pdf]

## 1 Appendix

### 1.1 Self-labeling

In our experiments, the total iteration steps are set to 2. Since the detection threshold is crucial to the quality of the pseudo-ground truth label, we deploy the following strategy to find the proper threshold for different step: For a base detector, we randomly choose 200 COCO images and use different thresholds to label them, which shows that the detection thresholds are stable in the range  $[0.001, 0.005]$  and  $[0.015, 0.030]$  for each step, respectively. Then we empirically choose a threshold that gives the best label effects.

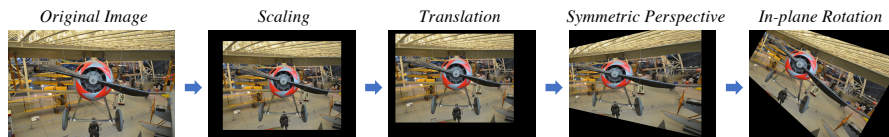

**Fig. 1.** The visualization of homography sampling. The input image is sequentially transformed by Scaling, Translation, Symmetric Perspective, and In-plane Rotation.

### 1.2 Homography sampling parameters

As stated in the paper, during the training, each image  $I$  in COCO is transformed by a randomly sampled homography to synthesize the corresponding image  $I'$ , resulting in the image pair. Like SuperPoint[1], the sampled homography combines four simple transformations, namely scaling, translation, symmetric perspective, and in-plane rotation. To ensure the sampled homography is reasonable, we constraint these sub-transformations in the following range:

$$\begin{aligned} \textit{Scaling} &: [0.8, 2.0], & \textit{Translation} &: [-0.1, 0.1], \\ \textit{Symmetric Perspective} &: [-0.3, 0.3], & \textit{In-plane Rotation} &: [-\pi/2, \pi/2], \end{aligned}$$

where the sampled value of *Scaling*, *Translation*, and *Symmetric Perspective* is relative to the input image's spatial size. The process of homography sampling can be seen in Fig. 1.

### 1.3 Photometric augmentation parameters

During the training, the same as SuperPoint[1], we use photometric augmentation to strengthen the model's robustness. Before an image input to the model for the training, it will be randomly processed by a series of sub-augmentations: 1) *Brightness*: Randomly adds value to all pixels; 2) *Contrast*: Randomly adjusts

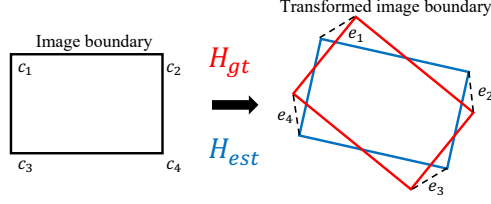

**Fig. 2.** The computation of homography error(HE). It is the mean distance between corners of the target image after being transformed by 1) the ground truth homography  $H_{gt}$  and 2) the estimated homography  $H_{est}$ . The dashed line  $e_i$  denotes the error.

image contrast by a scale; 3) *Gaussian Noise*: Randomly adds noise sampled from Gaussian distributions; 4) *Impulse Noise*: Randomly adds impulse noise. 5) *Motion Blur*: Randomly blurs an image with a given probability. The parameters of these sub-augmentations are listed as follows:

$$\begin{aligned} \text{Brightness} &: [-50, 50], & \text{Contrast} &: [0.5, 1.5], \\ \text{Gaussian Noise} &: \mu = 0, std \in [0, 10], & \text{Impulse Noise} &: [0, 0.0035], \\ \text{Motion Blur} &: p = 0.5, kernel = 3. \end{aligned}$$

For *Gaussian Noise*, the operation samples an  $std$  from the given range and generates Gaussian noise based on this  $std$ . Similarly, *Impulse Noise* samples a probability  $p$  and produces the noise under this probability.

#### 1.4 Computation of homography accuracy

The homography accuracy(HA) on HPatches is evaluated based on the homography error(HE). First, given a ground-truth homography transformation  $H_{gt}$  and the estimated one  $H_{est}$ , the HE is computed as follows:

$$HE = \frac{1}{4} \sum_i^4 \|(H_{gt} - H_{est})c_i\|, \quad (1)$$

where  $c_i$  is the  $i$ th corner of the original image, and the process is shown in Fig. 2. Then the homography accuracy under a threshold  $\epsilon$ (1-10 used in the paper) can be formulated as:

$$HA = \frac{1}{n} \sum_i^n (HE_i \leq \epsilon). \quad (2)$$

#### 1.5 Computation of recall

To compute  $\%Recall$  on FM-Bench, the average of normalized symmetric epipolar distance is used. This metric's detailed computation is illustrated in Alg.1

---

**Algorithm 1:** Average of Normalized Symmetric Geometry Distance
 

---

**Input** :  $F_1, F_2, N, h_1, w_1, h_2, w_2, I_1, I_2$   
**Output**:  $nsgd$

```

1  $nsgd = 0$ 
2  $count = 0$ 
3 while  $count < N$  do
4   randomly choose a point  $m$  in  $I_1$ 
5   draw  $l_1 = F_1 m$  in  $I_2$ 
6   if the epipolar line doesn't intersect in  $I_2$  then
7     go back to step 4
8   end
9   randomly choose a point  $m'$  in  $l_1$ 
10  draw  $l_2 = F_2 m$  in  $I_2$ 
11   $d' = \text{distance}(m', l_2) / \sqrt{h_2^2 + w_2^2}$ 
12  draw  $l_3 = F_2^T m'$  in  $I_1$ 
13   $d = \text{distance}(m, l_3) / \sqrt{h_1^2 + w_1^2}$ 
14   $nsgd = d' + d$ 
15   $count = count + 1$ 
16 end
17  $\text{swap}(F_1, F_2)$ 
18 repeat step 2-15
19  $ansgd = nsgd / 4N$ 
20 return  $ansgd$ 

```

---

and Fig. 3, where  $I_1, I_2$  are the input image pair, and  $F_1, F_2$  are the ground-truth fundamental matrix and the estimated fundamental matrix, respectively. Given  $ansgd$ , one can evaluate %Recall under a threshold  $\beta$  (0.05 as default[2]) as follows:

$$Recall = \frac{1}{n} \sum_{i=0}^n (ansgd_i \leq \beta). \quad (3)$$

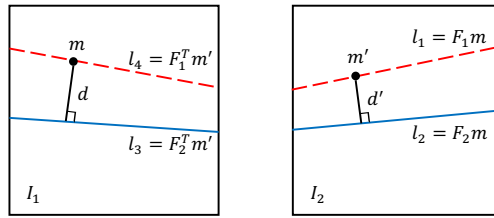

**Fig. 3.** Visualization of the epipolar distance between two fundamental matrices. Given  $m$  in  $I_1$ , one can generate epipolar line  $l_1$  based on  $F_1$ , and epipolar line  $l_2$  based on  $F_2$ . Analogously,  $l_3$  and  $l_4$  is the epipolar lines of  $m'$  respectively. The epipolar distance is thus defined as  $m'$  to  $l_2$ , and  $m$  to  $l_3$ .

## 1.6 More visualization results

Here we give more qualitative detecting and matching samples of our MLIFeat, which is shown in Fig. 4.

## References

1. DeTone, D., Malisiewicz, T., Rabinovich, A.: Superpoint: Self-supervised interest point detection and description. In: Proceedings of the IEEE Conference on Computer Vision and Pattern Recognition Workshops. (2018) 224–236
2. Bian, J.W., Wu, Y.H., Zhao, J., Liu, Y., Zhang, L., Cheng, M.M., Reid, I.: An evaluation of feature matchers for fundamental matrix estimation. arXiv preprint arXiv:1908.09474 (2019)
3. Sattler, T., Weyand, T., Leibe, B., Kobbelt, L.: Image retrieval for image-based localization revisited. In: BMVC. Volume 1. (2012) 4
4. Balntas, V., Lenc, K., Vedaldi, A., Mikolajczyk, K.: Hpatches: A benchmark and evaluation of handcrafted and learned local descriptors. In: Proceedings of the IEEE Conference on Computer Vision and Pattern Recognition. (2017) 5173–5182



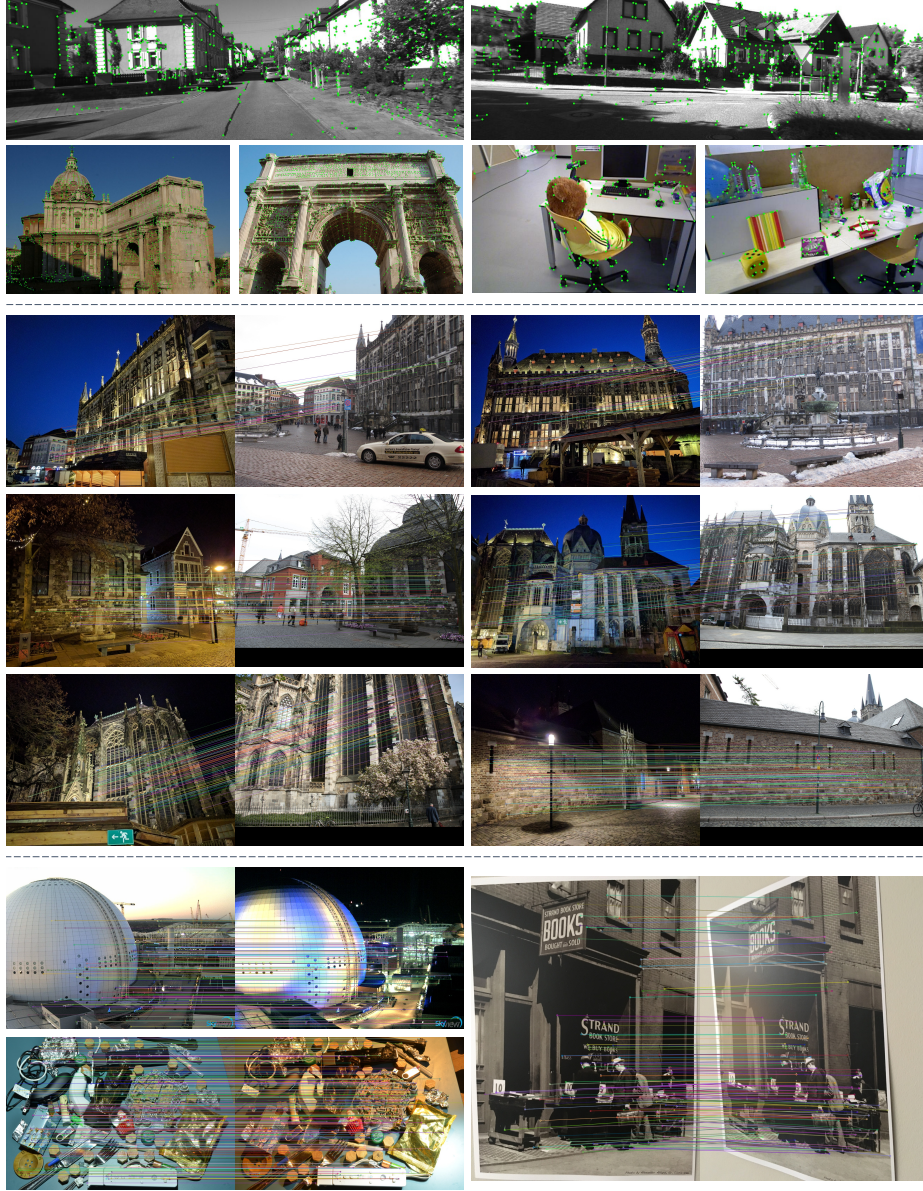

**Fig. 4.** Extra visualization samples of detecting and matching. The top block contains the detection samples of FM-Bench[2]. The middle and the bottom block contains the matching samples of Aachen-Day-Night[3] and HPatches[4], respectively.
